# Supplementary material for: Sources of nitrous acid (HONO) in the upper boundary layer and lower free troposphere of the North China Plain: insights from the Mount Tai Observatory
Source: Copernicus journal article supplement (doi:10.5194/acp-20-12115-2020), 2020-10-26
Supplement: Supplementary file 1 [file acp-20-12115-2020-supplement.pdf]

Supplement of Atmos. Chem. Phys., 20, 12115–12131, 2020  
<https://doi.org/10.5194/acp-20-12115-2020-supplement>  
© Author(s) 2020. This work is distributed under  
the Creative Commons Attribution 4.0 License.

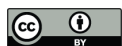

Atmospheric  
Chemistry  
and Physics  
Open Access  
EGU

*Supplement of*

## **Sources of nitrous acid (HONO) in the upper boundary layer and lower free troposphere of the North China Plain: insights from the Mount Tai Observatory**

**Ying Jiang et al.**

*Correspondence to:* Likun Xue (xuelikun@sdu.edu.cn)

The copyright of individual parts of the supplement might differ from the CC BY 4.0 License.

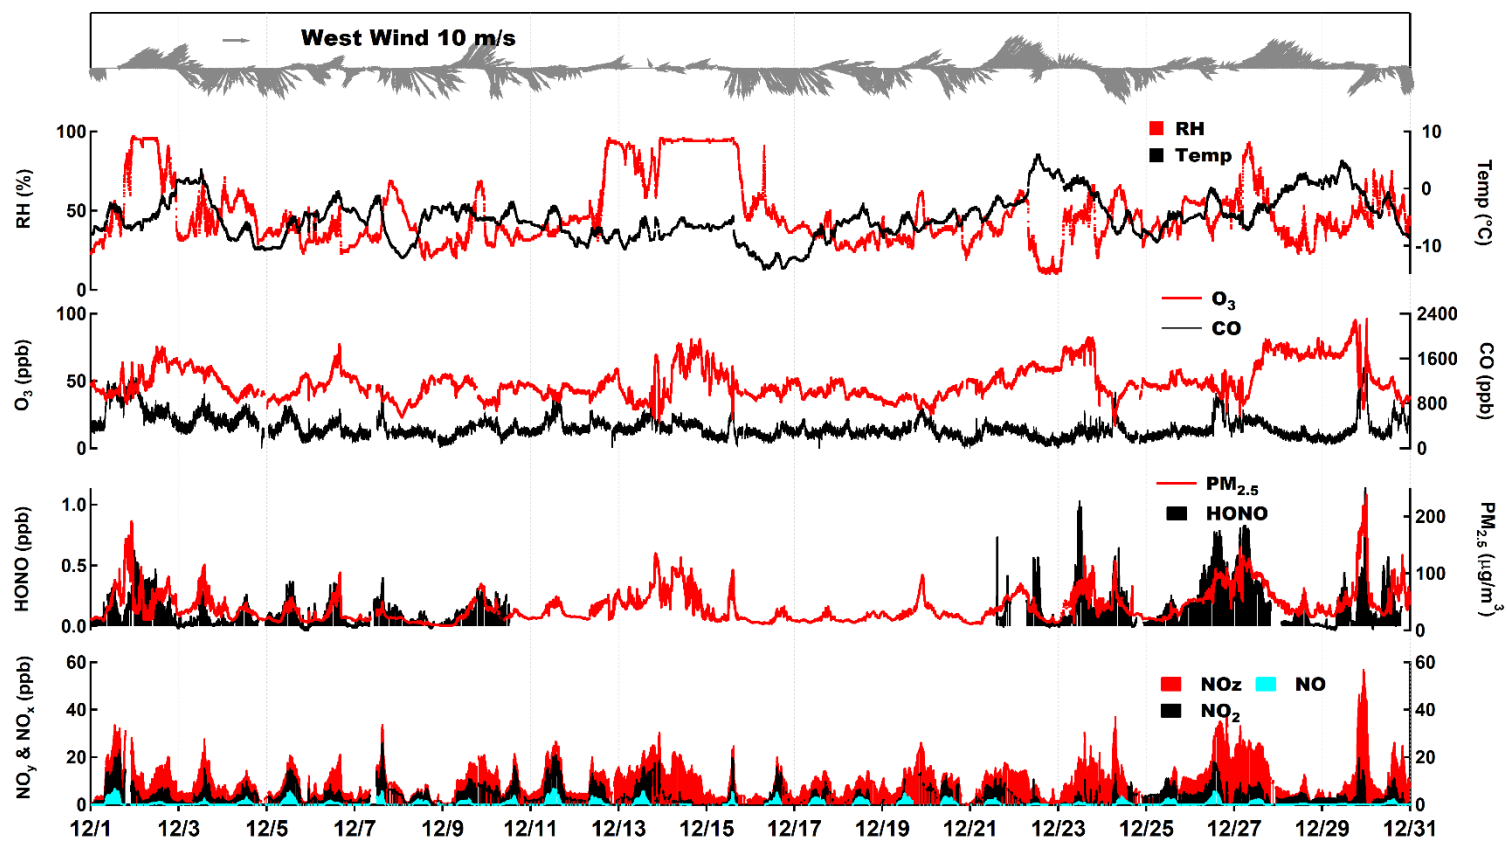

**Figure S1.** Time series of HONO and related parameters measured at Mt. Tai in winter 2017. The gap of measurement data was mainly due to the instrument failure and maintenance.

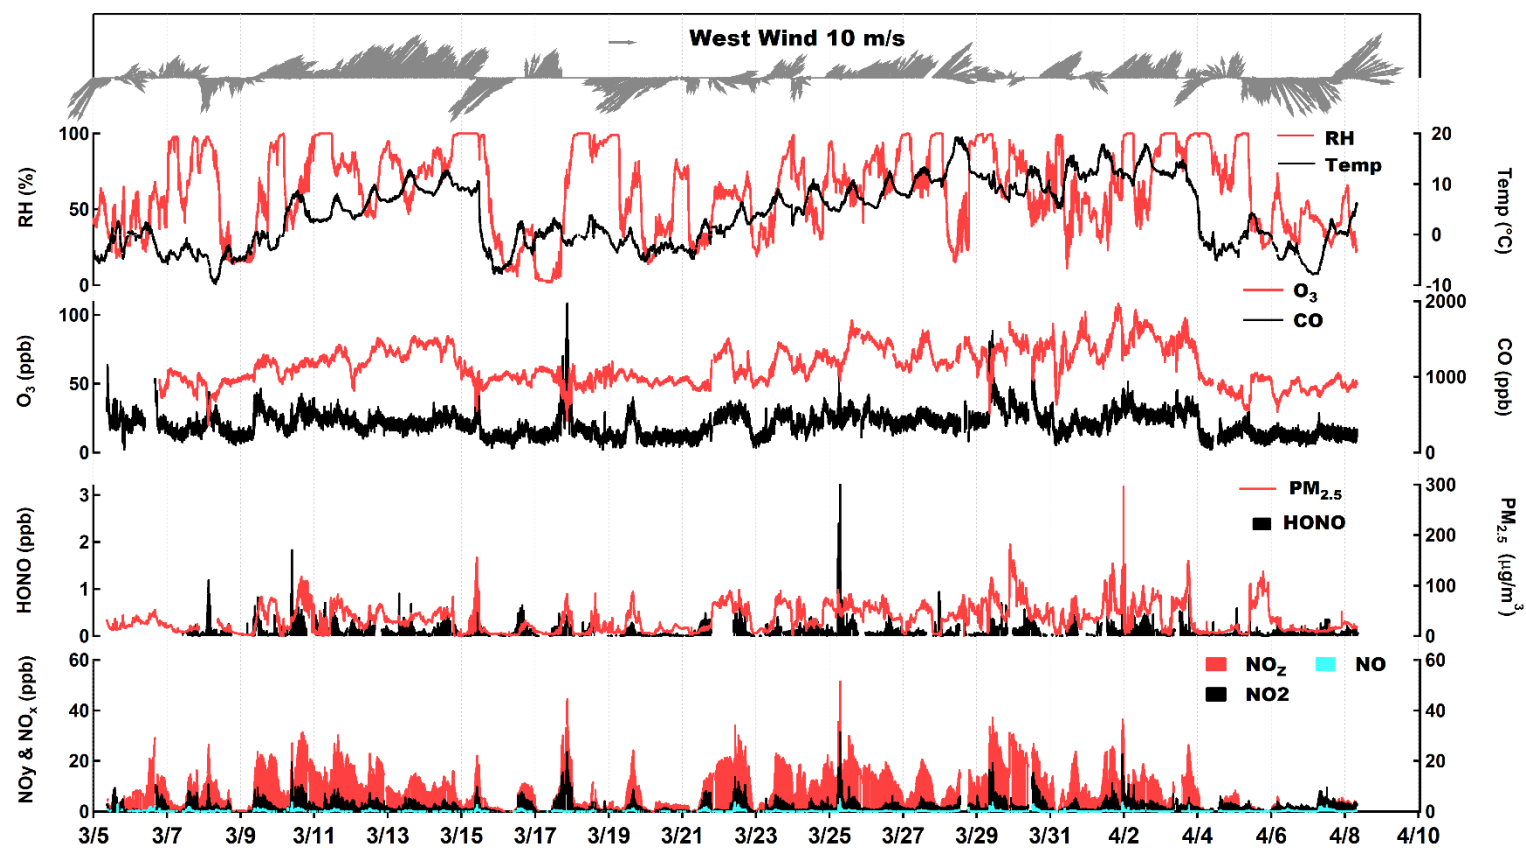

**Figure S2.** Time series of HONO and related parameters measured at Mt. Tai in spring 2018. The gap of data was mainly due to the instrument failure and maintenance.

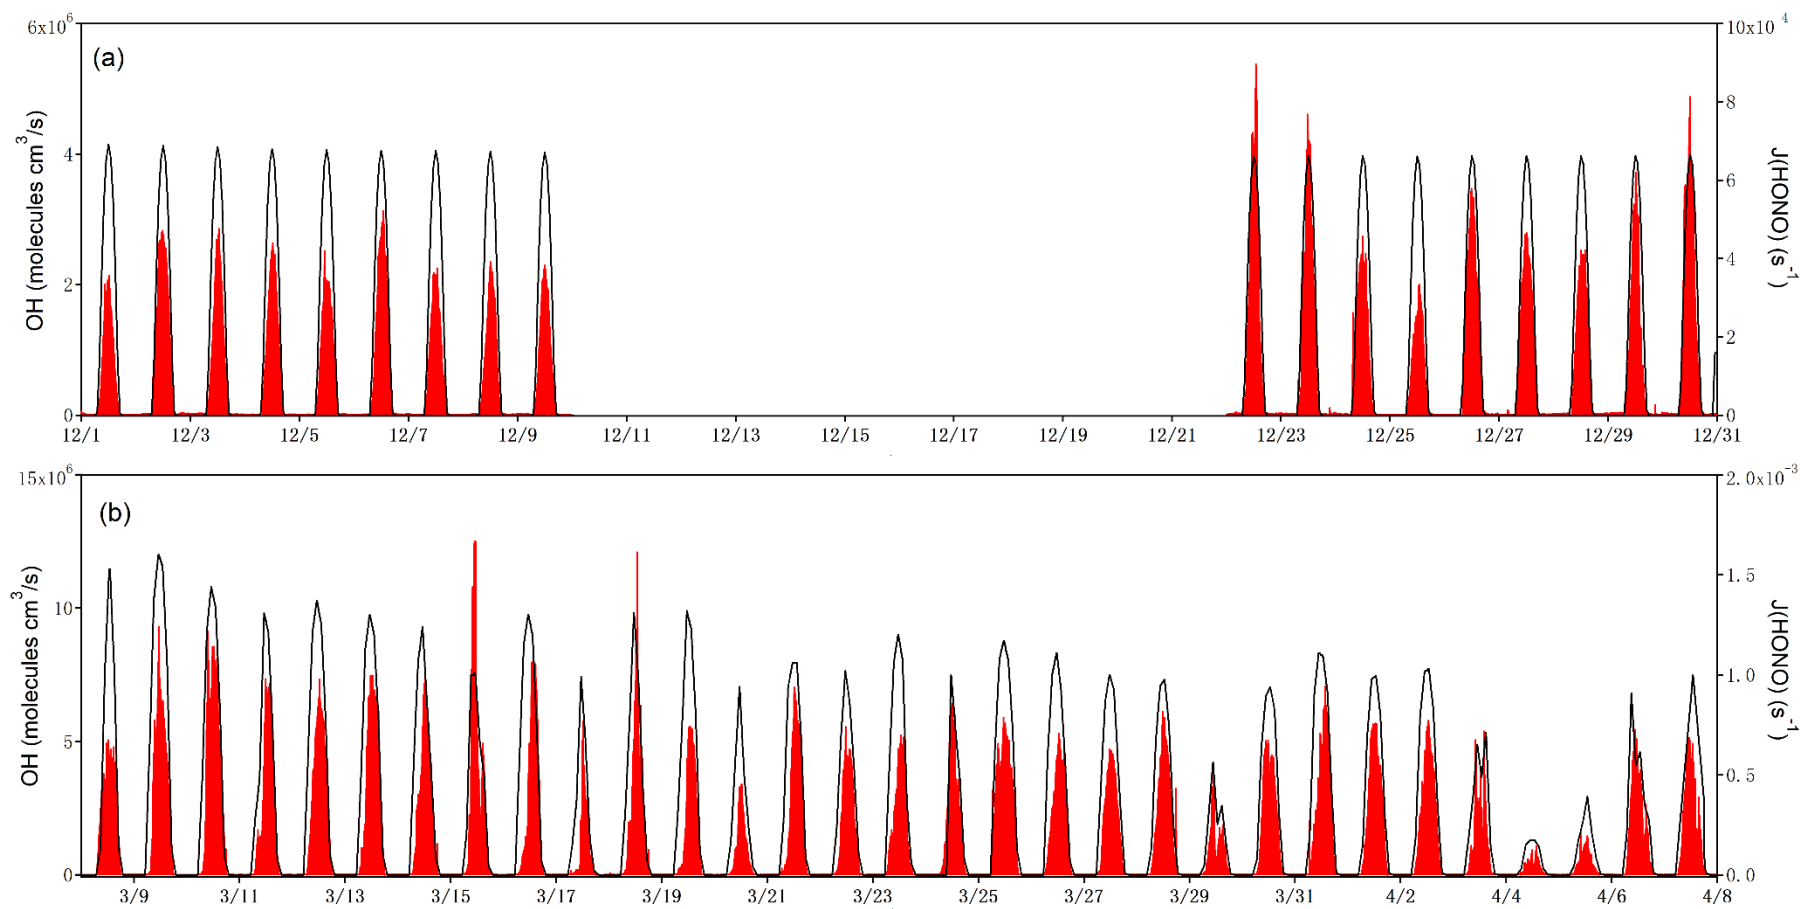

**Figure S3.** Time series of model-simulated OH concentrations (red) and measured-derived of  $J_{\text{HONO}}$  (black) at Mt. Tai in (a) winter 2017 and (b) spring 2018.

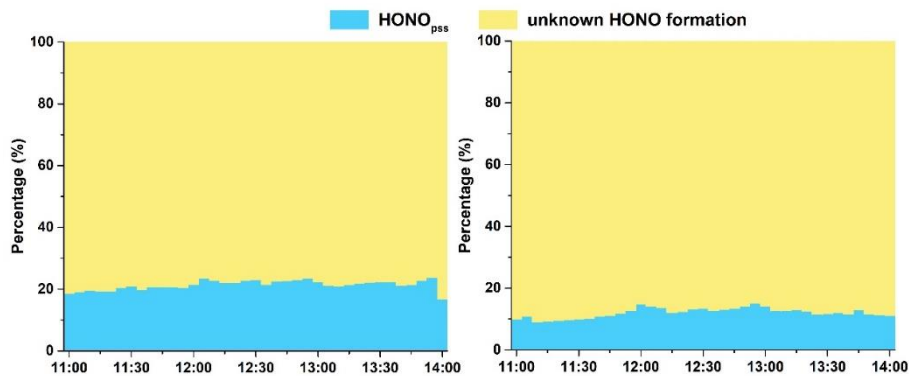

**Figure S4.** Relative contributions of  $[\text{HONO}]_{\text{PSS}}$  and unknown HONO formation to the observed HONO around noon in winter (left) and spring (right) at Mt. Tai.

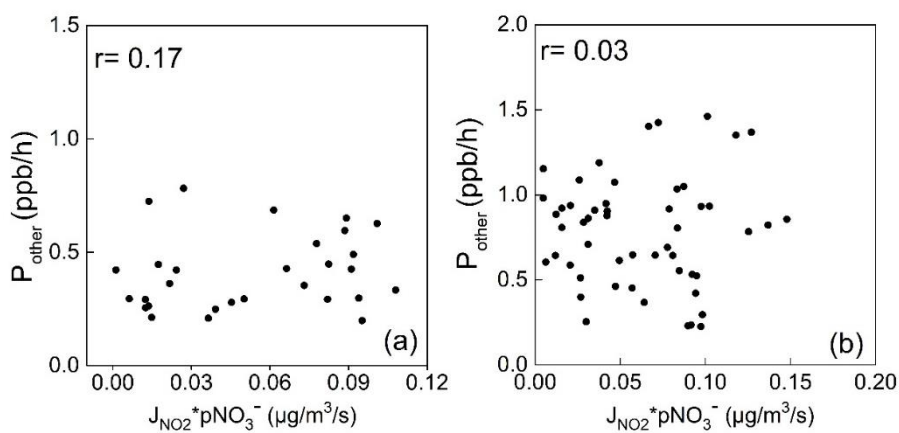

**Figure S5.** Scatter plots of the additional daytime HONO source strength ( $P_{\text{other}}$ ) with  $J_{\text{NO}_2} * p\text{NO}_3^-$  in (a) winter 2017 and (b) spring 2018.

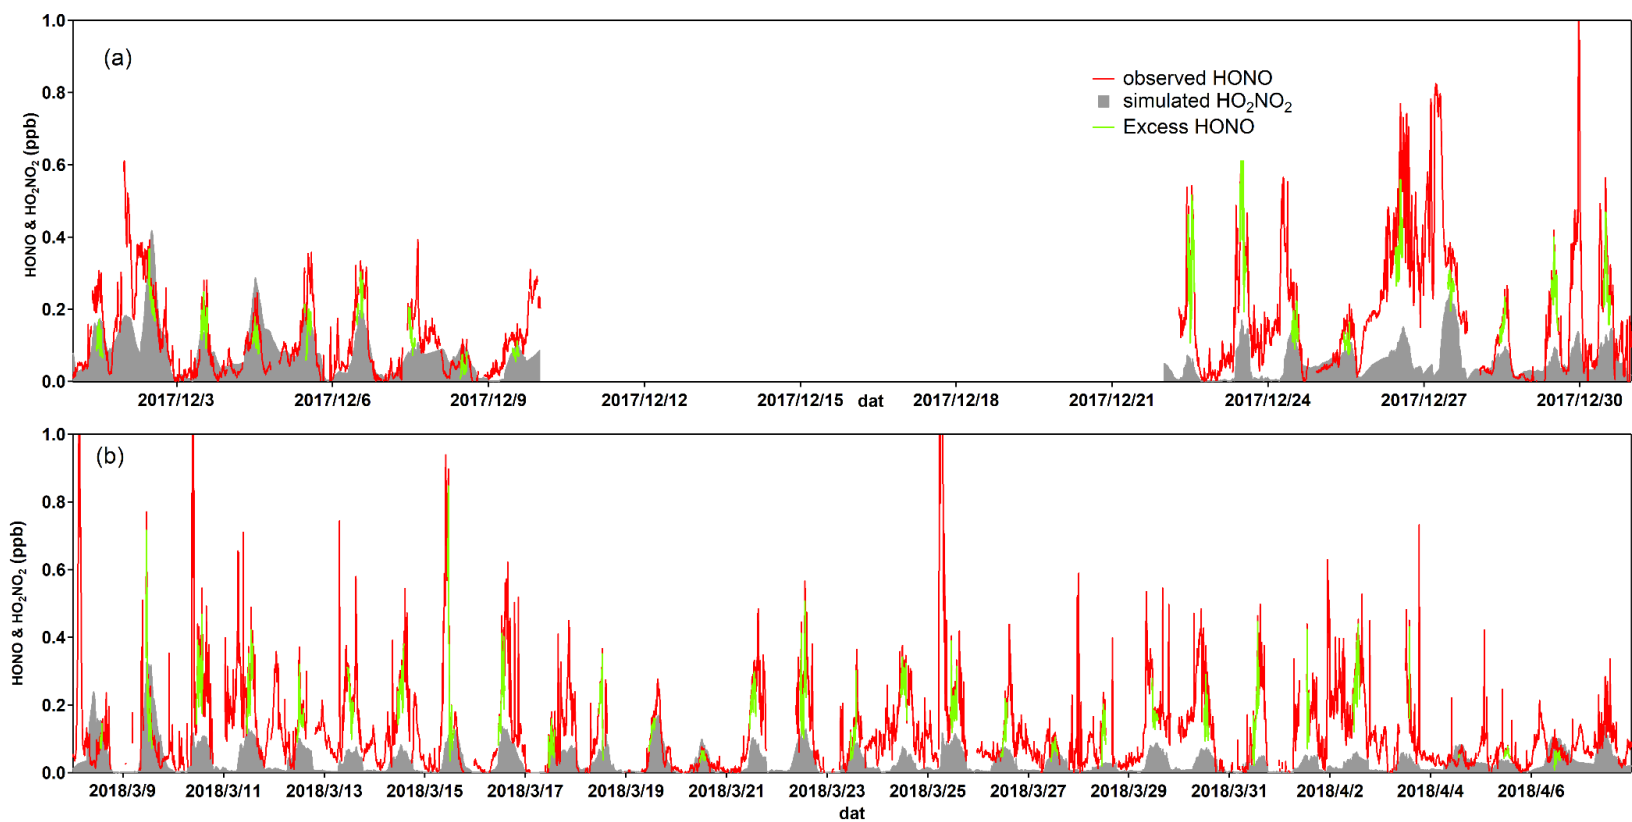

**Figure S6.** Model simulated HO<sub>2</sub>NO<sub>2</sub> concentrations (grey) and comparison with the measured HONO (red) and excess HONO (green; measured HONO minus [HONO]<sub>pss</sub>) at Mt. Tai in (a) winter and (b) spring at Mt. Tai.

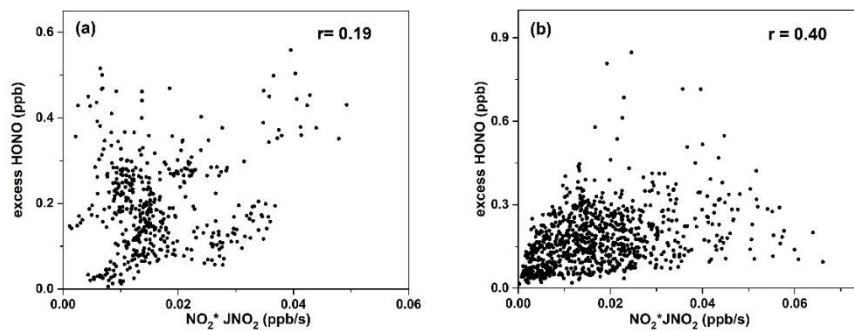

**Figure S7.** Scatter plots of excess HONO (measured HONO minus [HONO]<sub>pss</sub>) versus [NO<sub>2</sub>]\*J(NO<sub>2</sub>) at Mt. Tai in (a) winter and (b) spring.

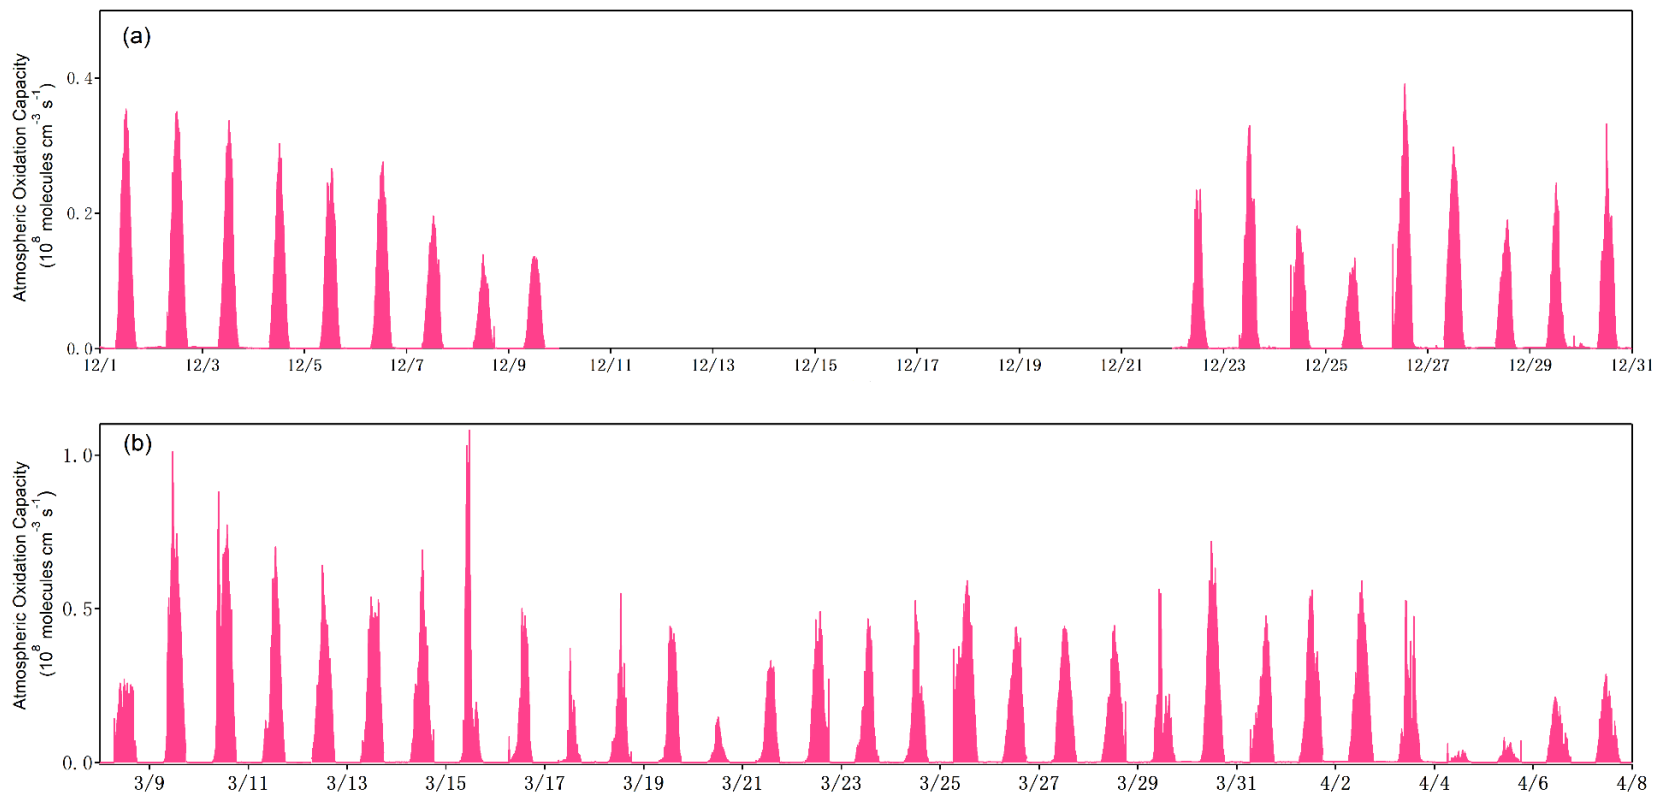

**Figure S8.** Model-simulated time series of atmospheric oxidation capacity (AOC) at Mt. Tai in (a) winter 2017 and (b) spring 2018.
